# Supplementary material for: New insight for spent hops utilization: simultaneous extraction of protein and xanthohumol using deep eutectic solvents
Source: Springer Nature journal article supplement (doi:10.1007/s13399-022-03462-5), 2022-11-04
Supplement: MOESM1 [file 23678028]

**Supplementary Material**

**New Insight for Spent Hops Utilization: Simultaneous Extraction of Protein and Xanthohumol using Deep Eutectic Solvents**

Aleksandra Grudniewska* and Natalia Pastyrczyk

Department of Food Chemistry and Biocatalysis, Wrocław University of Environmental and Life Sciences, Norwida 25, 50-375 Wrocław, Poland

* Corresponding Author; E-mail: aleksandra.grudniewska@upwr.edu.pl

Number of Pages: 6

Number of Figures: 4

Number of Tables: 1

**Table S1.** Amounts of SH, DES, and antisolvent (water) used in this study

| DES | SH/DES ratio  [w/w] | Antisolvent/DES ratio  [v/w] | SH  [g] | DES  [g] | Antisolvent  [mL] |
| --- | --- | --- | --- | --- | --- |
| DES-1 | 1:50 | 4:1 | 4 | 200 | 800 |
| DES-2 | 1:40 | 3:1 | 4 | 160 | 480 |
| DES-3 | 1:50 | 3:1 | 4 | 200 | 600 |
| DES-4 | 1:40 | 5:1 | 4 | 160 | 800 |


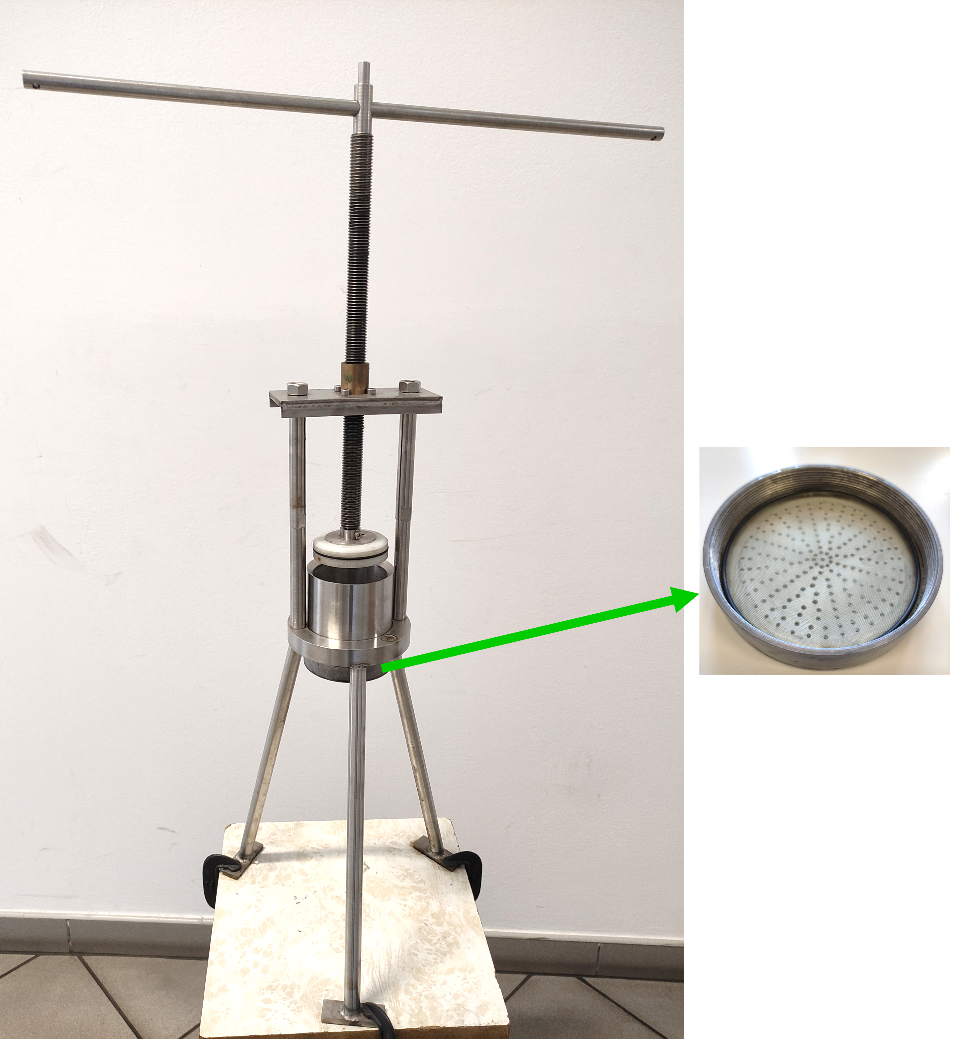


**Fig. S1.** Extrusion press.


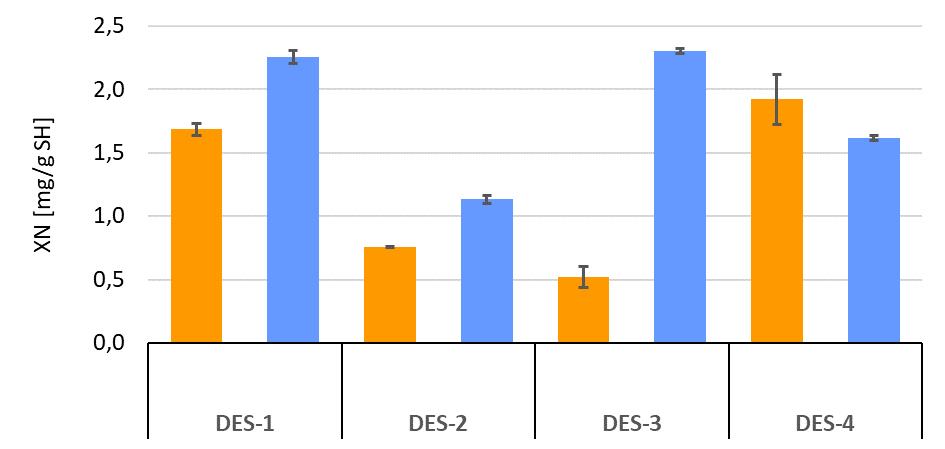


**Fig. S2.** Comparison of the XN extraction efficiency in this (orange bars) and previous work (blue bars).* The amounts of SH used were 4 g in this study and 0.5 g in the previous work; the other extraction parameters were the same.

* Grudniewska A, Popłoński J (2020) Simple and green method for the extraction of xanthohumol from spent hops using deep eutectic solvents. Sep Purif Technol 250:117196. https://doi.org/10.1016/j.seppur.2020.117196


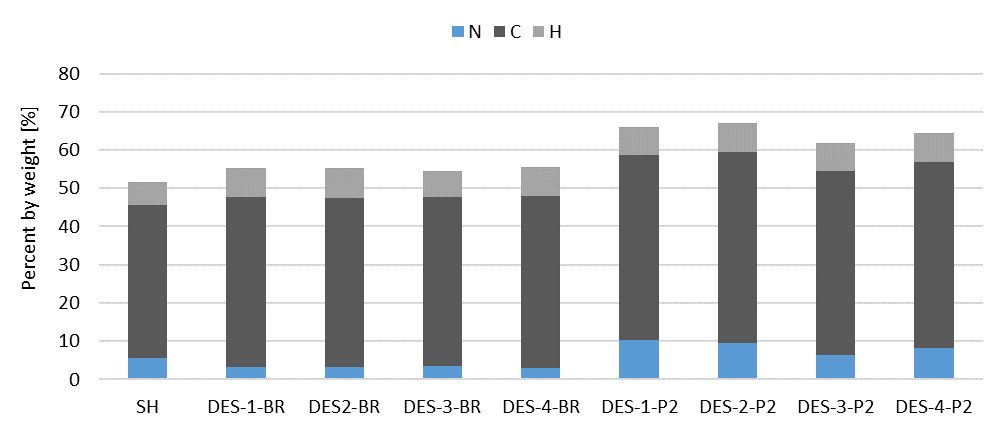


**Fig. S3.** Nitrogen (N), carbon (C), and hydrogen (H) content according to the elemental analysis of SH, BR, and P2samples.

**Identification of proteins from SDS-PAGE gels according to a bottom-up strategy using the nano-LC-MS/MS technique**

*Sample preparation procedure prior to LC-MS/MS analysis*

SDS-PAGE was performed on a Mini-PROTEAN Tetra Vertical Electrophoresis Cell System (Bio-Rad) using 15% polyacrylamide gel and Tris-glycine-SDS running buffer (25 mM Tris, 192 mM glycine, 0.1% SDS, pH 8.3). After solubilizing 0.8 mg of sample (DES-1-P2) in 0.2 mL of buffer (2% SDS, 75 mM Tris-HCl pH 6.8, 100 mM dithiothreitol), the mixture was heated at 95 °C for 5 min in a thermoblock. Then, 10 μL of this solution was mixed with 90 μL of Laemmli buffer and incubated at 95 °C for 10 min in a thermoblock. Aliquots of 20, 15, and 10 μL of the prepared samples and 2 μL of protein standard markers ([Precision Plus Protein™ Unstained Protein Standards](https://www.bio-rad.com/en-pl/sku/1610363-precision-plus-protein-unstained-protein-standards-strep-tagged-recombinant-1-ml?ID=1610363), Bio-Rad; 10–250 kDa) were loaded onto the gel. The gel was run for approximately 90 min at 120 V and stained with **Coomassie Brilliant Blue G-250.** Gel images were recorded using a GelDoc XR+ System (Bio-Rad). The bands of interest (Nos. 1, 2, 3, and 4 in Fig. S3) were excised from the SDS-PAGE gel, cut into squares, and de-stained using a 1:1 (v/v) mixture of 100 mM NH4HCO3 and acetonitrile. Protein disulfide bonds were reduced and alkylated with 10 mM dithiothreitol and 55 mM iodoacetamide in 100 mM NH4HCO3. Proteins were digested overnight by saturating the gel with 13 ng/µL trypsin (Promega, Sequencing Grade Modified Trypsin) solution in 10 mM NH4HCO3 containing 10% (v/v) acetonitrile. After digestion, the peptides were extracted from the gel using a 2:1 (v/v) mixture of acetonitrile and 0.1% aqueous formic acid. The samples prepared in this manner were lyophilized, dissolved in 23 μL of 0.1% aqueous formic acid solution, and subjected to LC-MS/MS analysis.


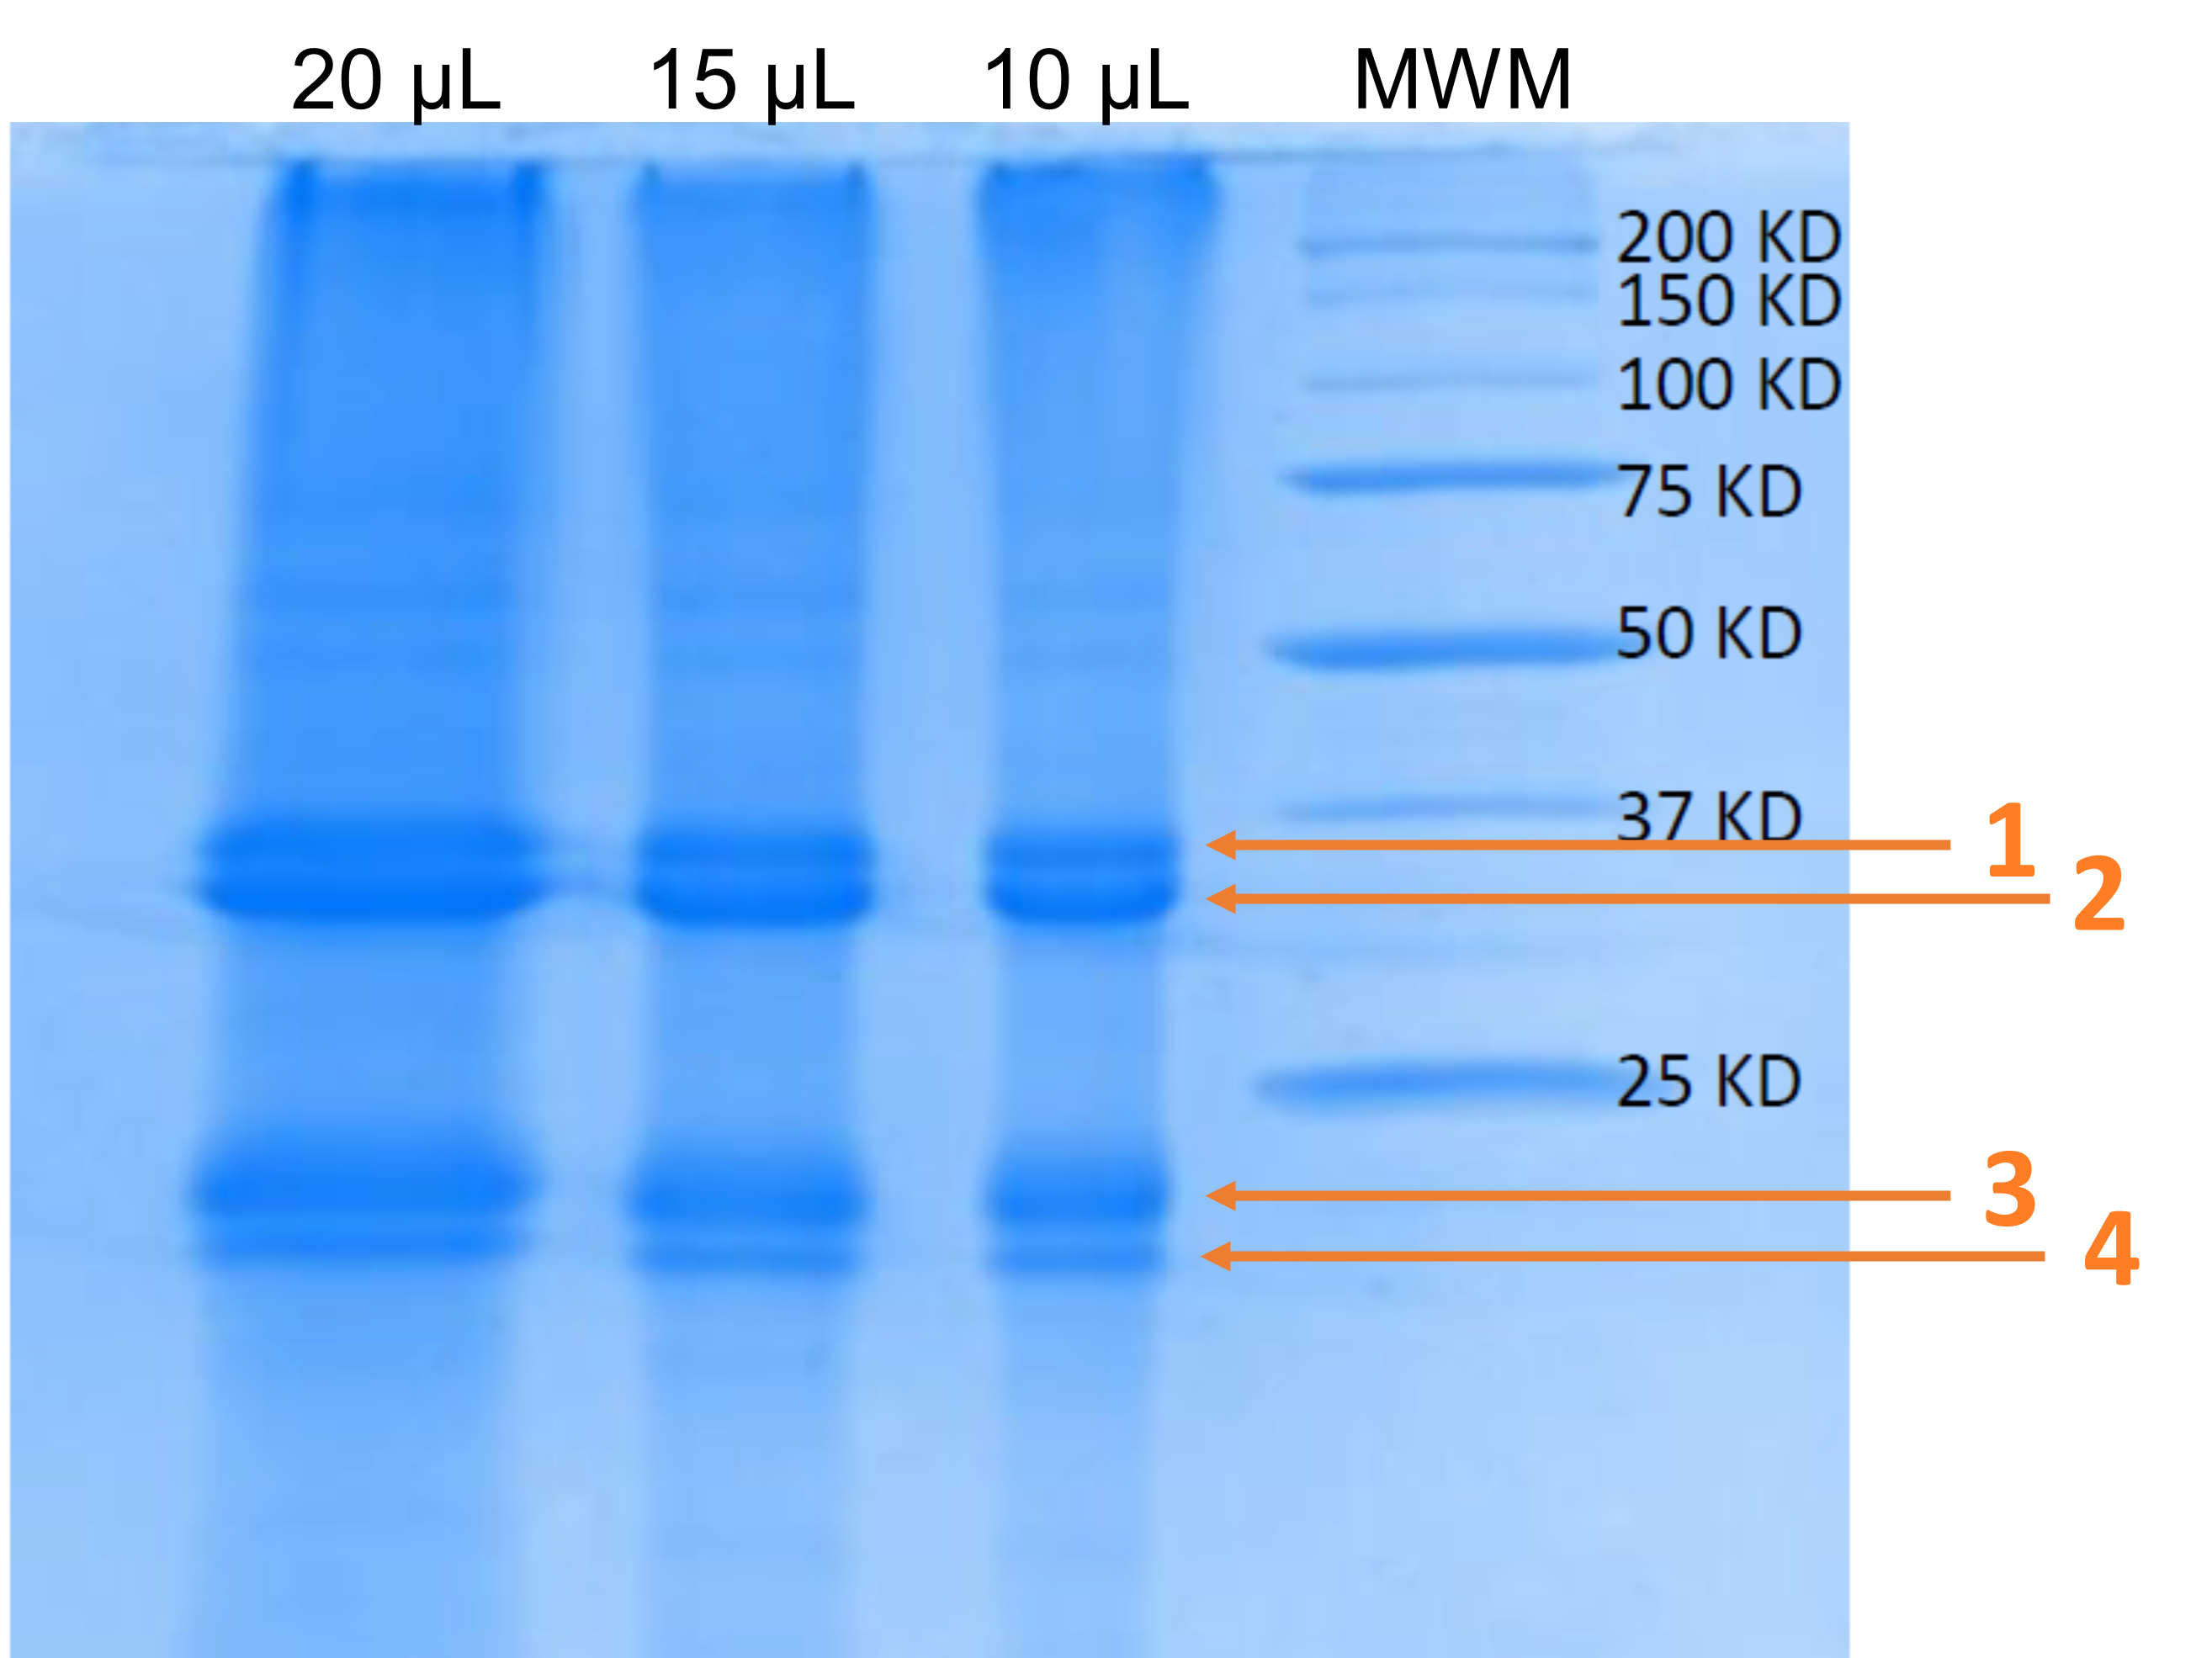


**Fig. S4.** SDS-PAGE patterns of DES-1-P2 samples (20, 15, and 10 μL). MWM = molecular weight markers. Bands 1, 2, 3, and 4 were analyzed according to a bottom-up strategy using the nano-LC-MS/MS technique.

*Nano-LC-MS/MS analysis*

Nano-LC-MS/MS analysis was performed using an EASY nLC 1000 system (Thermo Scientific) coupled to an LTQ Orbitrap Elite mass spectrometer (Thermo Scientific).

- *Key parameters of the nano-LC separation*

Chromatography column: Acclaim PrepMap C18, 100A, 500 nm × 0.75 nm × 3 nm (Thermo Scientific). Mobile phase: solvent A (0.1% formic acid), solvent B (0.1% formic acid:acetonitrile, 10:90, v/v). Flow: 300 nL/min. Column temperature: ambient temperature. Gradient: 2–55% B over 100 min. Injection: 5 μL.

- *Key parameters of the MSn method*

Ion mode: positive. Measurement method: full-scan. Capillary voltage: 3000 V. Measuring range: 110–2000 m/z. Fragmentation: HCD. Collision energy: normalized 30 eV. Isolation window: 2 m/z. Parent ion charge: 2+ and greater. Calibration: external to LTQ Velos Positive (Pierce) standard, SD ≤ 1 ppm.

*Data analysis*

The LC-MS/MS data were processed with Proteome Discoverer 2.0 software and subjected to database searching using Mascot Server 2.5.0 and Sequest HT.

- *Mascot search parameters*

Database: SwissPort_2019_03.fasta (SwissPort database, containing manually annotated sequences, updated to 01.05.2019); main search parameters: taxonomy: *Viridiplante* (green plants); enzyme: trypsin; maximum number of abandoned digestion sites: 3; maximum allowable peptide mass error: 10 ppm (MS), 0.1 Da (MS/MS); minimum peptide length: 5; possible modifications: carbamidomethylation (Cys) = constant, oxidation (Met) = variable, acetylation (protein N-terminus) = variable.

- *Sequest search parameters*

Databases: uniport-taxonomy_Cannabaceae.fasta (Swiss Port + TrEMBL database - containing both manually and automatically annotated sequences of cannabis plants, updated to 20.11.2019) and maskedCascade_withMatthews_longestTranscript_len150.fasta (amino acid database created on the basis of Cascade hop sequencing, http://hopbase.cgrb.oregonstate.edu/, updated to 21.11.2019); enzyme: trypsin; maximum number of abandoned digestion sites: 3; maximum allowable peptide mass error: 10 ppm (MS), 0.1 Da (MS/MS); minimum peptide length: 5; possible modifications: carbamidomethylation (Cys) = constant, oxidation (Met) = variable, acetylation (protein N-terminus) = variable.

A list of identified proteins (as a result of exporting data from the Proteome Discoverer software) is provided in the Supplementary Material (XLSX file). Only proteins identified by two or more peptides were included in the resulting file.
