# Supplementary material for: New insight for spent hops utilization: simultaneous extraction of protein and xanthohumol using deep eutectic solvents
Source: Springer Nature journal article supplement (doi:10.1007/s13399-022-03462-5), 2022-11-04
Supplement: MOESM2 [file 23678028]

## Sheet: Band 1
Accession	Description	Coverage	# Peptides	# PSMs	# Unique Peptides	# AAs	MW [kDa]	calc. pI	Score Sequest HT	# Peptides Sequest HT	Score Mascot	# Peptides Mascot
003727F.g13.t1	003727F.g13.t1	52.1385	32	335	6	491	55.888	8.53	1109.82	32
003727F.g6.t1	003727F.g6.t1	48.4725	31	331	5	491	55.862	8.37	1087.33	31
001956F.g19.t1	001956F.g19.t1	51.1111	33	116	4	630	72.186	7.52	374.984	33
004487F.g4.t1	004487F.g4.t1	41.2429	9	120	1	177	20.323	5.86	373.696	9
007971F.g15.t1	007971F.g15.t1	66.3136	32	104	2	472	53.969	8.7	330.008	32
001956F.g21.t1	001956F.g21.t1	63.8723	31	102	5	501	57.121	8.07	313.739	31
A0A090CXP8	Edestin 2 OS=Cannabis sativa OX=3483 GN=ede2C PE=3 SV=1	8.9613	6	95	1	491	55.951	8.69	286.27	6
001956F.g22.t1	001956F.g22.t1	36.5801	22	68	6	462	52.635	7.03	198.482	22
A0A090DLH8	Edestin 1 OS=Cannabis sativa OX=3483 GN=ede1A PE=3 SV=1	19.5695	12	58	3	511	58.468	8.57	187.282	12
000028F.g23.t1	000028F.g23.t1	28.0856	18	45	18	794	92.46	6.74	144.491	18
A0A2P5CNM9	11-S seed storage protein OS=Parasponia andersonii OX=3476 GN=PanWU01x14_137460 PE=3 SV=1	17.8295	11	41	3	516	58.778	7.8	135.002	11
001956F.g20.t1	001956F.g20.t1	32.334	19	46	3	467	53.135	7.5	134.69	19
007971F.g10.t1	007971F.g10.t1	27.6231	16	33	2	467	53.282	7.27	91.2982	16
A0A219D3H6	Edestin 3 OS=Cannabis sativa OX=3483 GN=CsEde3B PE=3 SV=1	14.8676	8	18	1	491	55.903	7.5	49.3143	8
A0A219D2X4	Edestin 3 OS=Cannabis sativa OX=3483 GN=CsEde3A PE=3 SV=1	13.5903	8	16	2	493	56.045	7.24	43.3457	8
005782F.g3.t1	005782F.g3.t1	10	2	5	2	310	33.769	9.39	13.1911	2
000551F.g29.t1	000551F.g29.t1	10.6195	3	5	3	226	25.32	10.48	11.5152	3
Q76H85	Histone H4 OS=Silene latifolia OX=37657 GN=SlH4 PE=3 SV=3	32.0388	3	12	3	103	11.402	11.47	10.6896	2	237.823	3
000063F.g92.t1	000063F.g92.t1	11.5756	3	4	3	311	33.835	9.8	9.23497	3
A0A2P5E392	Bicupin, oxalate decarboxylase/oxidase OS=Parasponia andersonii OX=3476 GN=PanWU01x14_004660 PE=4 SV=1	5.33708	2	3	1	712	84.226	7.2	8.602	2
000525F.g74.t1	000525F.g74.t1	11.4094	2	2	2	298	33.795	7.85	4.49186	2
Q49L18	Photosystem II protein D1 OS=Eucalyptus globulus subsp. globulus OX=71271 GN=psbA PE=3 SV=1	6.51558	2	5	2	353	38.939	5.25	2.14871	1	188.94	2
A0A2P5CJJ7	Uncharacterized protein OS=Trema orientale OX=63057 GN=TorRG33x02_282390 PE=4 SV=1	4.28571	2	2	2	490	56.28	8.31	0	2
P28260	Ribulose bisphosphate carboxylase large chain OS=Ipomoea purpurea OX=4121 GN=rbcL PE=3 SV=1	5.41667	3	9	3	480	53.354	6.87			246.171	3
P15193	Chlorophyll a-b binding protein type 2 member 1A, chloroplastic OS=Pinus sylvestris OX=3349 PE=2 SV=1	6.47482	2	4	2	278	29.459	5.43			152.338	2
O80400	Phloroisovalerophenone synthase OS=Humulus lupulus OX=3486 GN=VPS PE=2 SV=1	5.32995	2	3	2	394	43.052	7.21			85.748	2
Q06GR5	Photosystem II D2 protein OS=Piper cenocladum OX=398741 GN=psbD PE=3 SV=1	5.36723	2	2	2	354	39.709	5.57			55.8538	2

## Sheet: Band 2
Accession	Description	Coverage	# Peptides	# PSMs	# Unique Peptides	# AAs	MW [kDa]	calc. pI	Score Sequest HT	# Peptides Sequest HT	Score Mascot	# Peptides Mascot
001956F.g19.t1	001956F.g19.t1	60.9524	43	427	5	630	72.186	7.52	1257.27	43
007971F.g15.t1	007971F.g15.t1	70.7627	44	407	7	472	53.969	8.7	1205.64	44
001956F.g21.t1	001956F.g21.t1	71.0579	38	399	6	501	57.121	8.07	1187.78	38
007971F.g9.t1	007971F.g9.t1	64.0816	33	379	1	490	55.721	8.25	1108.55	33
001956F.g22.t1	001956F.g22.t1	46.5368	29	212	8	462	52.635	7.03	664.633	29
001956F.g20.t1	001956F.g20.t1	49.4647	29	152	4	467	53.135	7.5	488.565	29
A0A090CXP7	Edestin 1 OS=Cannabis sativa OX=3483 GN=ede1B PE=3 SV=1	24.6575	13	138	4	511	58.487	8.73	430.409	13
003727F.g6.t1	003727F.g6.t1	48.2688	24	101	4	491	55.862	8.37	330.58	24
007971F.g10.t1	007971F.g10.t1	47.5375	27	107	1	467	53.282	7.27	324.288	27
003727F.g13.t1	003727F.g13.t1	40.5295	23	97	3	491	55.888	8.53	315.534	23
A0A2P5CNM9	11-S seed storage protein OS=Parasponia andersonii OX=3476 GN=PanWU01x14_137460 PE=3 SV=1	17.8295	11	102	4	516	58.778	7.8	311.865	11
A0A219D3H6	Edestin 3 OS=Cannabis sativa OX=3483 GN=CsEde3B PE=3 SV=1	26.2729	13	55	1	491	55.903	7.5	183.929	13
A0A219D2X4	Edestin 3 OS=Cannabis sativa OX=3483 GN=CsEde3A PE=3 SV=1	18.4584	13	52	3	493	56.045	7.24	167.208	13
004487F.g4.t1	004487F.g4.t1	39.548	6	33	1	177	20.323	5.86	105.246	6
A0A090CXP8	Edestin 2 OS=Cannabis sativa OX=3483 GN=ede2C PE=3 SV=1	7.12831	3	28	1	491	55.951	8.69	83.3748	3
000028F.g23.t1	000028F.g23.t1	12.5945	9	23	9	794	92.46	6.74	74.0397	9
A0A2P5FLM1	11-S seed storage protein OS=Trema orientale OX=63057 GN=TorRG33x02_055740 PE=3 SV=1	5.76541	2	25	2	503	57.437	8.92	70.6516	2
A0A2P5CNJ7	11-S seed storage protein OS=Parasponia andersonii OX=3476 GN=PanWU01x14_137440 PE=3 SV=1	19.2308	7	24	2	494	56.394	8.15	60.312	7
000525F.g79.t1	000525F.g79.t1	33.1058	6	17	2	293	33.083	8.27	49.6065	6
000525F.g74.t1	000525F.g74.t1	36.5772	7	17	3	298	33.795	7.85	47.8118	7
A0A2P5CV30	Desiccation-related protein OS=Parasponia andersonii OX=3476 GN=PanWU01x14_120820 PE=4 SV=1	5.80645	2	7	2	310	33.385	8.76	25.0677	2
000063F.g100.t1	000063F.g100.t1	18.6391	4	7	4	338	36.946	9.54	22.6478	4
003078F.g22.t2	003078F.g22.t2	8.64865	2	3	2	185	20.111	10.59	7.80078	2
002327F.g58.t2	002327F.g58.t2	6.21762	2	2	2	386	42.813	8.25	5.09246	2
Q49L18	Photosystem II protein D1 OS=Eucalyptus globulus subsp. globulus OX=71271 GN=psbA PE=3 SV=1	8.49858	3	7	3	353	38.939	5.25	4.6969	1	156.932	3
Q76H85	Histone H4 OS=Silene latifolia OX=37657 GN=SlH4 PE=3 SV=3	41.7476	4	7	4	103	11.402	11.47	2.65167	1	185.089	4
Q9XQJ6	Ribulose bisphosphate carboxylase large chain (Fragment) OS=Pachira aquatica OX=69118 GN=rbcL PE=3 SV=1	6.39659	4	10	1	469	52.04	6.68			242.63	4
P28260	Ribulose bisphosphate carboxylase large chain OS=Ipomoea purpurea OX=4121 GN=rbcL PE=3 SV=1	6.875	4	9	1	480	53.354	6.87			195.056	4
P15193	Chlorophyll a-b binding protein type 2 member 1A, chloroplastic OS=Pinus sylvestris OX=3349 PE=2 SV=1	6.47482	2	6	2	278	29.459	5.43			184.719	2
P16867	Histone H2B.3 OS=Volvox carteri OX=3067 PE=3 SV=3	10.1911	2	4	2	157	17	9.94			116.381	2

## Sheet: Band 3
Accession	Description	Coverage	# Peptides	# PSMs	# Unique Peptides	# AAs	MW [kDa]	calc. pI	Score Sequest HT	# Peptides Sequest HT	Score Mascot	# Peptides Mascot
003727F.g13.t1	003727F.g13.t1	33.8086	25	170	8	491	55.888	8.53	605.884	25
001956F.g21.t1	001956F.g21.t1	51.2974	30	169	6	501	57.121	8.07	605.581	30
007971F.g15.t1	007971F.g15.t1	56.3559	31	164	7	472	53.969	8.7	600.073	31
001956F.g19.t1	001956F.g19.t1	49.2063	32	166	8	630	72.186	7.52	593.737	32
003727F.g6.t1	003727F.g6.t1	32.7902	20	135	1	491	55.862	8.37	458.176	20
001956F.g22.t1	001956F.g22.t1	37.2294	16	45	3	462	52.635	7.03	128.374	16
001956F.g20.t1	001956F.g20.t1	31.2634	13	34	2	467	53.135	7.5	94.2057	13
A0A2P5CNJ7	11-S seed storage protein OS=Parasponia andersonii OX=3476 GN=PanWU01x14_137440 PE=3 SV=1	22.8745	10	26	1	494	56.394	8.15	79.9371	10
A0A090CXP8	Edestin 2 OS=Cannabis sativa OX=3483 GN=ede2C PE=3 SV=1	4.27699	2	5	1	491	55.951	8.69	16.1103	2
001772F.g40.t1	001772F.g40.t1	12.963	3	4	3	216	23.587	4.84	12.6812	3
A0A2P5AYC6	11-S seed storage protein OS=Parasponia andersonii OX=3476 GN=PanWU01x14_288890 PE=3 SV=1	4.12574	2	5	1	509	57.857	8.9	11.8923	2
Q76H85	Histone H4 OS=Silene latifolia OX=37657 GN=SlH4 PE=3 SV=3	25.2427	2	5	2	103	11.402	11.47	7.61206	2	53.05	1
003078F.g22.t2	003078F.g22.t2	8.64865	2	2	2	185	20.111	10.59	5.41574	2
P36213	Photosystem I reaction center subunit II, chloroplastic OS=Hordeum vulgare OX=4513 GN=psaD PE=1 SV=1	7.80488	2	3	2	205	21.919	9.8			108.04	2
Q1S9I9	Probable histone H2B.1 OS=Medicago truncatula OX=3880 PE=3 SV=3	11.4865	2	4	2	148	16.214	10.08			87.7635	2

## Sheet: Band 4
Accession	Description	Coverage	# Peptides	# PSMs	# Unique Peptides	# AAs	MW [kDa]	calc. pI	Score Sequest HT	# Peptides Sequest HT	Score Mascot	# Peptides Mascot
001956F.g22.t1	001956F.g22.t1	31.6017	16	132	3	462	52.635	7.03	477.933	16
001956F.g20.t1	001956F.g20.t1	31.2634	16	121	3	467	53.135	7.5	431.017	16
001956F.g19.t1	001956F.g19.t1	34.6032	24	108	5	630	72.186	7.52	397.073	24
001956F.g21.t1	001956F.g21.t1	44.3114	24	110	6	501	57.121	8.07	390.386	24
007971F.g15.t1	007971F.g15.t1	42.3729	21	103	3	472	53.969	8.7	381.797	21
A0A2P5CNJ7	11-S seed storage protein OS=Parasponia andersonii OX=3476 GN=PanWU01x14_137440 PE=3 SV=1	13.9676	10	67	3	494	56.394	8.15	227.359	10
A0A090DLH8	Edestin 1 OS=Cannabis sativa OX=3483 GN=ede1A PE=3 SV=1	22.1135	11	59	3	511	58.468	8.57	226.926	11
003727F.g13.t1	003727F.g13.t1	40.3259	21	57	7	491	55.888	8.53	223.811	21
A0A219D3H6	Edestin 3 OS=Cannabis sativa OX=3483 GN=CsEde3B PE=3 SV=1	13.442	6	52	1	491	55.903	7.5	187.092	6
003727F.g6.t1	003727F.g6.t1	35.2342	18	50	4	491	55.862	8.37	186.672	18
A0A2P5CNM9	11-S seed storage protein OS=Parasponia andersonii OX=3476 GN=PanWU01x14_137460 PE=3 SV=1	17.2481	8	46	3	516	58.778	7.8	164.424	8
000133F.g40.t1	000133F.g40.t1	17.3913	2	3	2	161	17.973	5.47	9.83375	2
003078F.g22.t2	003078F.g22.t2	17.2973	2	2	1	185	20.111	10.59	5.60366	2
Q76H85	Histone H4 OS=Silene latifolia OX=37657 GN=SlH4 PE=3 SV=3	26.2136	2	4	2	103	11.402	11.47	5.5505	2	72.49	2
Q2HU65	Probable histone H2A.2 OS=Medicago truncatula OX=3880 GN=MtrDRAFT_AC149210g4v1 PE=3 SV=1	24.8366	2	4	1	153	16.298	10.86			115.835	2
P54348	Histone H2B.5 OS=Zea mays OX=4577 PE=2 SV=3	12.3377	3	4	3	154	16.607	10.02			107.562	3
